# Supplementary material
Source: MDPI journal article supplement (https://www.mdpi.com/1999-4907/14/5/910)
Supplement: s1 [file s1]

Table S1 Results of the Shapiro-Wilk and Levene's tests in the case of variables II (%), IH (%), BD (g.cm<sup>-3</sup>), MC (%), PR (MPa), PD (cm)

|                             | II <sup>a)</sup> |      | IH <sup>b)</sup> |      |
|-----------------------------|------------------|------|------------------|------|
| Shapiro-Wilk test (p-value) | 0.44             |      | 0.04             |      |
| Levene's test (p-value)     | 0.31             |      | 0.05             |      |
|                             | BD <sup>c)</sup> |      |                  |      |
|                             | 51a              | 10   | 9b               | 59   |
| Shapiro-Wilk test (p-value) | 0.18             | 0.40 | 0.97             | 0.98 |
| Levene's test (p-value)     | 0.50             | 0.04 | 0.02             | 0.71 |
|                             | MC <sup>d)</sup> |      |                  |      |
|                             | 51a              | 10   | 9b               | 59   |
| Shapiro-Wilk test (p-value) | 0.00             | 0.00 | 0.71             | 0.00 |
| Levene's test (p-value)     | 0.21             | 0.11 | 0.24             | 0.01 |
|                             | PR <sup>e)</sup> |      |                  |      |
|                             | 51a              | 10   | 9b               | 59   |
| Shapiro-Wilk test (p-value) | 0.00             | 0.00 | 0.00             | 0.00 |
| Levene's test (p-value)     | 0.00             | 0.06 | 0.00             | 0.00 |
|                             | PD <sup>f)</sup> |      |                  |      |
|                             | 51a              | 10   | 9b               | 59   |
| Shapiro-Wilk test (p-value) | 0.00             | 0.00 | 0.00             | 0.00 |
| Levene's test (p-value)     | 0.01             | 0.00 | 0.00             | 0.00 |

II<sup>a)</sup> – intensity of injuries (%); IH<sup>b)</sup> – intensity of harvesting (%); BD<sup>c)</sup> – bulk density (g.cm<sup>-3</sup>); MC<sup>d)</sup> – soil moisture (%); PR<sup>e)</sup> – penetration resistance (MPa); PD<sup>f)</sup> – penetration depth (cm)

Table S2: Comparison of BD from the same measurement locations in different stands via the multiple p-value comparisons

| Stand  | Multiple p-value comparisons for bulk density<br>Kruskal-Wallis test: H ( 3, N= 60) = 10.51, p = 0.02 |      |      |       |
|--------|-------------------------------------------------------------------------------------------------------|------|------|-------|
|        | 51a                                                                                                   | 10   | 9b   | 59    |
| 51a    |                                                                                                       | 1.00 | 1.00 | 0.01* |
| 10     | 1.00                                                                                                  |      | 1.00 | 0.64  |
| 9b     | 1.00                                                                                                  | 1.00 |      | 0.14  |
| 59     | 0.01*                                                                                                 | 0.64 | 0.14 |       |
| Rut    | Multiple p-value comparisons for bulk density<br>Kruskal-Wallis test: H ( 3, N= 60) = 11.22, p = 0.01 |      |      |       |
|        | 51a                                                                                                   | 10   | 9b   | 59    |
| 51a    |                                                                                                       | 0.64 | 0.09 | 0.01* |
| 10     | 0.64                                                                                                  |      | 1.00 | 0.78  |
| 9b     | 0.09                                                                                                  | 1.00 |      | 1.00  |
| 59     | 0.01*                                                                                                 | 0.78 | 1.00 |       |
| Centre | Multiple p-value comparisons for bulk density<br>Kruskal-Wallis test: H ( 3, N= 60) = 0.82, p = 0.85  |      |      |       |
|        | 51a                                                                                                   | 10   | 9b   | 59    |
| 51a    |                                                                                                       | 1.00 | 1.00 | 1.00  |
| 10     | 1.00                                                                                                  |      | 1.00 | 1.00  |
| 9b     | 1.00                                                                                                  | 1.00 |      | 1.00  |
| 59     | 1.00                                                                                                  | 1.00 | 1.00 |       |

\*indicates significant differences with  $p < 0.05$

Table S3: Comparison of BD between different measurement locations in particular stands via the multiple p-value comparisons

| 51a            | Multiple p-value comparisons for bulk density<br>Kruskal-Wallis test: H ( 2, N= 42) = 6.91, p = 0.03 |                |                |
|----------------|------------------------------------------------------------------------------------------------------|----------------|----------------|
|                | S <sup>a</sup>                                                                                       | R <sup>b</sup> | C <sup>c</sup> |
| S <sup>a</sup> |                                                                                                      | 0.10           | 0.05*          |
| R <sup>b</sup> | 0.10                                                                                                 |                | 1.00           |
| C <sup>c</sup> | 0.05*                                                                                                | 1.00           |                |

|     |                                                                                                      |                |                |
|-----|------------------------------------------------------------------------------------------------------|----------------|----------------|
| 51a | Multiple p-value comparisons for bulk density<br>Kruskal-Wallis test: $H(2, N=42) = 6.91, p = 0.03$  |                |                |
|     | S <sup>a</sup>                                                                                       | R <sup>b</sup> | C <sup>c</sup> |
| 10  | Multiple p-value comparisons for bulk density<br>Kruskal-Wallis test: $H(2, N=42) = 7.15, p = 0.03$  |                |                |
|     | S                                                                                                    | R              | C              |
| S   |                                                                                                      | 0.03*          | 0.20           |
| R   | 0.03*                                                                                                |                | 1.00           |
| C   | 0.20                                                                                                 | 1.00           |                |
| 9b  | Multiple p-value comparisons for bulk density<br>Kruskal-Wallis test: $H(2, N=42) = 16.33, p = 0.00$ |                |                |
|     | S                                                                                                    | R              | C              |
| S   |                                                                                                      | 0.00*          | 0.04*          |
| R   | 0.00*                                                                                                |                | 0.37           |
| C   | 0.04*                                                                                                | 0.37           |                |
| 59  | Multiple p-value comparisons for bulk density<br>Kruskal-Wallis test: $H(2, N=54) = 13.26, p = 0.00$ |                |                |
|     | S                                                                                                    | R              | C              |
| S   |                                                                                                      | 0.00*          | 0.67           |
| R   | 0.00*                                                                                                |                | 0.05           |
| C   | 0.67                                                                                                 | 0.05           |                |

\*indicates significant differences with  $p < 0.05$ ; S<sup>a</sup> – stand, R<sup>b</sup> – rut, C<sup>c</sup> – centre of the trail

Table S4: Comparison of MC from the same measurement locations in different stands via the multiple p-value comparisons

|        |                                                                                                       |      |      |       |
|--------|-------------------------------------------------------------------------------------------------------|------|------|-------|
| Stand  | Multiple p-value comparisons for soil moisture<br>Kruskal-Wallis test: $H(3, N=60) = 10.51, p = 0.02$ |      |      |       |
|        | 51a                                                                                                   | 10   | 9b   | 59    |
| 51a    |                                                                                                       | 1.00 | 1.00 | 0.01* |
| 10     | 1.00                                                                                                  |      | 1.00 | 0.64  |
| 9b     | 1.00                                                                                                  | 1.00 |      | 0.14  |
| 59     | 0.01*                                                                                                 | 0.64 | 0.14 |       |
| Rut    | Multiple p-value comparisons for soil moisture<br>Kruskal-Wallis test: $H(3, N=60) = 11.22, p = 0.01$ |      |      |       |
|        | 51a                                                                                                   | 10   | 9b   | 59    |
| 51a    |                                                                                                       | 0.64 | 0.09 | 0.01* |
| 10     | 0.64                                                                                                  |      | 1.00 | 0.78  |
| 9b     | 0.09                                                                                                  | 1.00 |      | 1.00  |
| 59     | 0.01*                                                                                                 | 0.78 | 1.00 |       |
| Centre | Multiple p-value comparisons for soil moisture<br>Kruskal-Wallis test: $H(3, N=60) = 0.82, p = 0.85$  |      |      |       |
|        | 51a                                                                                                   | 10   | 9b   | 59    |
| 51a    |                                                                                                       | 1.00 | 1.00 | 1.00  |
| 10     | 1.00                                                                                                  |      | 1.00 | 1.00  |
| 9b     | 1.00                                                                                                  | 1.00 |      | 1.00  |
| 59     | 1.00                                                                                                  | 1.00 | 1.00 |       |

\*indicates significant differences with  $p < 0.05$

Table S5: Comparison of MC between different measurement locations in particular stands via the multiple p-value comparisons

|                |                                                                                                       |                |                |
|----------------|-------------------------------------------------------------------------------------------------------|----------------|----------------|
| 51             | Multiple p-value comparisons for soil moisture<br>Kruskal-Wallis test: $H(2, N=41) = 10.68, p = 0.01$ |                |                |
|                | S <sup>a</sup>                                                                                        | R <sup>b</sup> | C <sup>c</sup> |
| S <sup>a</sup> |                                                                                                       | 0.00*          | 0.93           |
| R <sup>b</sup> | 0.00*                                                                                                 |                | 0.08           |
| C <sup>c</sup> | 0.93                                                                                                  | 0.08           |                |
| 10             | Multiple p-value comparisons for soil moisture<br>Kruskal-Wallis test: $H(2, N=42) = 4.21, p = 0.12$  |                |                |

|    |                                                                                                       |                |                |
|----|-------------------------------------------------------------------------------------------------------|----------------|----------------|
| 51 | Multiple p-value comparisons for soil moisture<br>Kruskal-Wallis test: $H(2, N=41) = 10.68, p = 0.01$ |                |                |
|    | S <sup>a</sup>                                                                                        | R <sup>b</sup> | C <sup>c</sup> |
|    | S                                                                                                     | R              | C              |
| S  |                                                                                                       | 0.17           | 1.00           |
| R  | 0.17                                                                                                  |                | 0.33           |
| C  | 1.00                                                                                                  | 0.33           |                |
| 9b | Multiple p-value comparisons for soil moisture<br>Kruskal-Wallis test: $H(2, N=42) = 3.96, p = 0.14$  |                |                |
|    | S                                                                                                     | R              | C              |
|    | S                                                                                                     | R              | C              |
| S  |                                                                                                       | 0.15           | 1.00           |
| R  | 0.15                                                                                                  |                | 0.67           |
| C  | 1.00                                                                                                  | 0.67           |                |
| 59 | Multiple p-value comparisons for soil moisture<br>Kruskal-Wallis test: $H(2, N=54) = 5.52, p = 0.06$  |                |                |
|    | S                                                                                                     | R              | C              |
|    | S                                                                                                     | R              | C              |
| S  |                                                                                                       | 0.06           | 0.47           |
| R  | 0.06                                                                                                  |                | 1.00           |
| C  | 0.47                                                                                                  | 1.00           |                |

\*indicates significant differences with  $p < 0.05$ ; S<sup>a</sup> – stand, R<sup>b</sup> – rut, C<sup>c</sup> – centre of the trail

Table S6: Comparison of PR from the same measurement locations in different stands via the multiple p-value comparisons

|        |                                                                                                                   |       |       |       |
|--------|-------------------------------------------------------------------------------------------------------------------|-------|-------|-------|
| Stand  | Multiple p-value comparisons for penetration resistance<br>Kruskal-Wallis test: $H(3, N=1827) = 3.32, p = 0.34$   |       |       |       |
|        | 51a                                                                                                               | 10    | 9b    | 59    |
|        | 51a                                                                                                               | 10    | 9b    | 59    |
| 51a    |                                                                                                                   | 0.43  | 1.00  | 1.00  |
| 10     | 0.43                                                                                                              |       | 1.00  | 1.00  |
| 9b     | 1.00                                                                                                              | 1.00  |       | 1.00  |
| 59     | 1.00                                                                                                              | 1.00  | 1.00  |       |
| Rut    | Multiple p-value comparisons for penetration resistance<br>Kruskal-Wallis test: $H(3, N=1558) = 139.01, p = 0.00$ |       |       |       |
|        | 51a                                                                                                               | 10    | 9b    | 59    |
|        | 51a                                                                                                               | 10    | 9b    | 59    |
| 51a    |                                                                                                                   | 0.00* | 0.00* | 0.00* |
| 10     | 0.00*                                                                                                             |       | 1.00  | 0.00* |
| 9b     | 0.00*                                                                                                             | 1.00  |       | 0.00* |
| 59     | 0.00*                                                                                                             | 0.00* | 0.00* |       |
| Centre | Multiple p-value comparisons for penetration resistance<br>Kruskal-Wallis test: $H(3, N=1924) = 107.32, p = 0.00$ |       |       |       |
|        | 51a                                                                                                               | 10    | 9b    | 59    |
|        | 51a                                                                                                               | 10    | 9b    | 59    |
| 51a    |                                                                                                                   | 0.74  | 0.25  | 0.00* |
| 10     | 0.74                                                                                                              |       | 1.00  | 0.00* |
| 9b     | 0.25                                                                                                              | 1.00  |       | 0.00* |
| 59     | 0.00*                                                                                                             | 0.00* | 0.00* |       |

\*indicates significant differences with  $p < 0.05$

Table S7: Comparison of PR between different measurement locations in particular stands via the multiple p-value comparisons

|                |                                                                                                                  |                |                |
|----------------|------------------------------------------------------------------------------------------------------------------|----------------|----------------|
| 51a            | Multiple p-value comparisons for penetration resistance<br>Kruskal-Wallis test: $H(2, N=974) = 11.63, p = 0.00$  |                |                |
|                | S <sup>a</sup>                                                                                                   | R <sup>b</sup> | C <sup>c</sup> |
|                | S <sup>a</sup>                                                                                                   | R <sup>b</sup> | C <sup>c</sup> |
| S <sup>a</sup> |                                                                                                                  | 0.24           | 0.18           |
| R <sup>b</sup> | 0.24                                                                                                             |                | 0.00*          |
| C <sup>c</sup> | 0.18                                                                                                             | 0.00*          |                |
| 10             | Multiple p-value comparisons for penetration resistance<br>Kruskal-Wallis test: $H(2, N=1096) = 13.77, p = 0.00$ |                |                |
|                | S                                                                                                                | R              | C              |
|                | S                                                                                                                | R              | C              |

|     |                                                                                                                   |                |                |
|-----|-------------------------------------------------------------------------------------------------------------------|----------------|----------------|
| 51a | Multiple p-value comparisons for penetration resistance<br>Kruskal-Wallis test: H ( 2, N= 974) =11.63, p = 0.00   |                |                |
|     | S <sup>a</sup>                                                                                                    | R <sup>b</sup> | C <sup>c</sup> |
|     | S                                                                                                                 | 0.00*          | 0.06           |
|     | R                                                                                                                 | 0.00*          | 0.31           |
| 9b  | Multiple p-value comparisons for penetration resistance<br>Kruskal-Wallis test: H ( 2, N= 1658) = 23.08, p = 0.00 |                |                |
|     | S                                                                                                                 | R              | C              |
|     | S                                                                                                                 | 0.00*          | 1.00           |
|     | R                                                                                                                 | 0.00*          | 0.00*          |
| 59  | Multiple p-value comparisons for penetration resistance<br>Kruskal-Wallis test: H ( 2, N= 1582) = 38.96, p = 0.00 |                |                |
|     | S                                                                                                                 | R              | C              |
|     | S                                                                                                                 | 0.00*          | 0.00*          |
|     | R                                                                                                                 | 0.00*          | 0.62           |
| C   | Multiple p-value comparisons for penetration resistance<br>Kruskal-Wallis test: H ( 2, N= 1582) = 38.96, p = 0.00 |                |                |
|     | S                                                                                                                 | R              | C              |
|     | S                                                                                                                 | 0.00*          | 0.00*          |
|     | R                                                                                                                 | 0.00*          | 0.62           |

\*indicates significant differences with  $p < 0.05$ ; S<sup>a</sup> – stand, R<sup>b</sup> – rut, C<sup>c</sup> – centre of the trail

Table S8: Comparison of PD from the same measurement locations in different stands via the multiple p-value comparisons

|        |                                                                                                               |       |       |       |
|--------|---------------------------------------------------------------------------------------------------------------|-------|-------|-------|
| Stand  | Multiple p-value comparisons for penetration depth<br>Kruskal-Wallis test: H ( 3, N= 1827) = 172.36, p = 0.00 |       |       |       |
|        | 51a                                                                                                           | 10    | 9b    | 59    |
|        | 51a                                                                                                           | 1.00  | 0.00* | 0.83  |
|        | 10                                                                                                            | 1.00  | 0.00* | 0.18  |
|        | 9b                                                                                                            | 0.00* | 0.00* | 0.00* |
| Rut    | Multiple p-value comparisons for penetration depth<br>Kruskal-Wallis test: H ( 3, N= 1559) =139.79, p =0.00   |       |       |       |
|        | 51a                                                                                                           | 10    | 9b    | 59    |
|        | 51a                                                                                                           | 0.00* | 0.00* | 0.00* |
|        | 10                                                                                                            | 0.00* | 1.00  | 0.00* |
|        | 9b                                                                                                            | 0.00* | 1.00  | 0.00* |
| Centre | Multiple p-value comparisons for penetration depth<br>Kruskal-Wallis test: H ( 3, N= 1924) =103.7, p = 0.00   |       |       |       |
|        | 51a                                                                                                           | 10    | 9b    | 59    |
|        | 51a                                                                                                           | 0.00* | 0.00* | 0.00* |
|        | 10                                                                                                            | 0.00* | 0.08  | 0.00* |
|        | 9b                                                                                                            | 0.00* | 0.08  | 0.27  |
| 59     | Multiple p-value comparisons for penetration depth<br>Kruskal-Wallis test: H ( 3, N= 1924) =103.7, p = 0.00   |       |       |       |
|        | 51a                                                                                                           | 10    | 9b    | 59    |
|        | 51a                                                                                                           | 0.00* | 0.00* | 0.00* |
|        | 10                                                                                                            | 0.00* | 0.08  | 0.00* |

\*indicates significant differences with  $p < 0.05$

Table S9: Comparison of PD between different measurement locations in particular stands via the multiple p-value comparisons

|     |                                                                                                            |                |                |
|-----|------------------------------------------------------------------------------------------------------------|----------------|----------------|
| 51a | Multiple p-value comparisons for penetration depth<br>Kruskal-Wallis test: H ( 2, N= 974) = 5.41, p = 0.07 |                |                |
|     | S <sup>a</sup>                                                                                             | R <sup>b</sup> | C <sup>c</sup> |
|     | S <sup>a</sup>                                                                                             | 0.12           | 0.19           |
|     | R <sup>b</sup>                                                                                             | 0.12           | 1.00           |
| 10  | Multiple p-value comparisons for penetration depth<br>Kruskal-Wallis test: H ( 2, N= 1096) =42.71 p = 0.00 |                |                |
|     | S                                                                                                          | R              | C              |
|     | S                                                                                                          | 0.00*          | 0.00*          |
|     | R                                                                                                          | 0.00*          | 0.00*          |

|     |                                                                                                              |                |                |
|-----|--------------------------------------------------------------------------------------------------------------|----------------|----------------|
| 51a | Multiple p-value comparisons for penetration depth<br>Kruskal-Wallis test: $H(2, N=974) = 5.41, p = 0.07$    |                |                |
|     | S <sup>a</sup>                                                                                               | R <sup>b</sup> | C <sup>c</sup> |
| R   | 0.00*                                                                                                        |                | 0.00*          |
| C   | 0.00*                                                                                                        | 0.00*          |                |
| 9b  | Multiple p-value comparisons for penetration depth<br>Kruskal-Wallis test: $H(2, N=1658) = 8.12, p = 0.02$   |                |                |
|     | S                                                                                                            | R              | C              |
| S   |                                                                                                              | 1.00           | 0.01*          |
| R   | 1.00                                                                                                         |                | 0.22           |
| C   | 0.01*                                                                                                        | 0.22           |                |
| 59  | Multiple p-value comparisons for penetration depth<br>Kruskal-Wallis test: $H(2, N=1582) = 103.28, p = 0.00$ |                |                |
|     | S                                                                                                            | R              | C              |
| S   |                                                                                                              | 0.00*          | 0.00*          |
| R   | 0.00*                                                                                                        |                | 0.00*          |
| C   | 0.00*                                                                                                        | 0.00*          |                |

\*indicates significant differences with  $p < 0.05$ ; S<sup>a</sup> – stand, R<sup>b</sup> – rut, C<sup>c</sup> – centre of the trail
